# Supplementary material for: A Z-scheme 2D/0D ZnIn2S4/ZnO heterostructure for efficient photocatalytic degradation of tetracycline: energy band engineering and morphology modulation
Source: Royal Society of Chemistry journal article supplement (doi:10.1039/d2cy01375d), 2022-11-14
Supplement: d2cy01375d1.pdf [file d2cy01375d1.pdf]

## Supporting Information

### **Z-scheme 2D/0D ZnIn<sub>2</sub>S<sub>4</sub>/ZnO heterostructure for efficient photocatalytic degradation of tetracycline: Energy band engineering and morphology modulation**

Ru Wang<sup>a,1</sup>, Xiaoyu Xie<sup>a,1</sup>, Chunxiang Xu<sup>a,\*</sup>, Rendong Ji<sup>b</sup>, Zengliang Shi<sup>a</sup>, Qiannan Cui<sup>a</sup>, and Mingliang Wang<sup>a,\*</sup>

<sup>a</sup> State Key Laboratory of Bioelectronics, School of Chemistry and Chemical Engineering, Southeast University, Nanjing 210096, China

<sup>b</sup> Faculty of Electronic Information Engineering, Huaiyin Institute of Technology, Huai'an 223003, China

\* To whom correspondence should be addressed. E-mail address: [xcxseu@seu.edu.cn](mailto:xcxseu@seu.edu.cn) (C. Xu); [wangmlchem@seu.edu.cn](mailto:wangmlchem@seu.edu.cn) (M. Wang)

<sup>1</sup> Ru Wang and Xiaoyu Xie contributed equally to this work.

#### **Characterization**

The morphology of the synthesized samples was characterized by scanning electron microscopy (SEM) (Carl Zeiss Ultra Plus). Transmission electron microscopy (TEM, JOEL JEM-2100) and X-ray diffraction (XRD) measurements with Cu K $\alpha$  radiation ( $\lambda = 0.15406$  nm) (Bruker D8 Advance) were used to characterize the crystal structure. The surface chemical states and valence band of the samples were investigated by X-ray photoelectron spectroscopy (XPS) (ESCALAB 250) and the binding energy of each element was calibrated by C 1s (284.6 eV). The work function of the XPS apparatus is 4.2 eV. The UV-vis diffuse reflectance spectra (DRS) of the samples were measured on a UV-vis spectrophotometer (UV-2600) with BaSO<sub>4</sub> as a reflectance standard. Ultraviolet photoelectron spectrum (UPS) was measured by a PHI5000 VersaProbe III (Scanning ESCA Microprobe) SCA (Spherical Analyzer), in which the photoelectron was generated using 21.2 eV ultraviolet light.

#### **Photocatalytic activity tests**

The light source of the photocatalytic degradation tests was performed by a mercury-

xenon lamp (Beijing NBET Technology, Mexe-500) at a distance of 10 cm from the reactor. The energy intensity is 180 mW/cm<sup>2</sup>. Photocatalytic degradation of TC (25 mg/L, 40 mL) was conducted under different rates of magnetic stirring. Before the photocatalytic reaction, the sample powders (10 mg) were immersed in TC solution and stirred in the dark for 2 h to establish an adsorption-desorption balance. During the test, 2 mL of the sample solution was taken every 10 min and analyzed by a UV-vis spectrometer (UV-1750, Shimadzu). The maximum absorption intensity of TC located at 367 nm is regarded as the representative of TC concentration. The efficiency of degradation is specified as  $1-C/C_0$ . Here,  $C$  is the remaining concentration of TC solution at each irradiated time interval, and  $C_0$  is the concentration of TC solution before irradiation.

### **Photoluminescence (PL) spectra and electrochemical measurements**

PL spectra and electrochemical measurements were conducted to investigate the process of charge separation and transfer. PL spectra were recorded by a spectrophotometer (Hitachi, F4600) with an excitation wavelength of 350 nm. Photocurrent and electrochemical impedance spectroscopy (EIS) measurements were performed in a three-electrode quartz cell with an electrochemical workstation (Shanghai Chenhua). The counter electrode is Pt foil, and the reference electrode is Ag/AgCl. The working electrode of the sample was prepared as follows. The sample powder (2 mg) was dispersed in ethanol (500  $\mu$ L) to form a suspension. Then the suspension was dropped with a coating area of 1 cm<sup>2</sup> on a fluorine-doped tin oxide (FTO) glass (1 cm $\times$ 2 cm).

### **Density functional theory (DFT) calculations**

To explore the charge transfer direction between the ZnIn<sub>2</sub>S<sub>4</sub> and ZnO, the Fermi levels of ZnIn<sub>2</sub>S<sub>4</sub> and ZnO were measured by DFT calculations using the Cambridge Sequential Total Energy Package (CASTEP) module. The geometry optimization of the bulk structures of ZnIn<sub>2</sub>S<sub>4</sub> and ZnO was implemented by Perdew-Burke- Ernzerhof (PBE) of the Generalized Gradient Approximation (GGA). The ZnIn<sub>2</sub>S<sub>4</sub> (102) surface

and ZnO (100) surface were cleaved from their bulk structures, respectively. The thickness of these surfaces was set to be around 8-10 Å, and a 30 Å of vacuum was introduced in the slab calculation. Monkhorst-Pack k-point mesh was 3x2x1 for ZnO (100) and 1x5x1 for ZnIn<sub>2</sub>S<sub>4</sub> (102). A plane-wave cutoff energy of 310 eV was used, which converged total energy differences to under 1 meV/atom.

### **Reactive species trapping tests**

Reactive species trapping was conducted to ensure the dominant species during the photocatalytic degradation of TC. Before mercury-xenon lamp irradiation, 5 mg of p-BQ, 5 mL of IPA, and 60 µL of TEOA as the scavenger of superoxide radical ( $\cdot\text{O}_2^-$ ), hydroxyl radical ( $\cdot\text{OH}$ ), and hole ( $\text{h}^+$ ) were added into TC (25 mg/L) solution, respectively. The real-time concentration of TC was determined by the same method as photocatalytic activity tests.

### **Electron spin resonance (ESR) measurements**

ESR measurement was performed to estimate the amount of  $\cdot\text{OH}$  and  $\cdot\text{O}_2^-$  created by photocatalysts. The catalyst (2 mg) was dispersed in deionized water or methanol (10 mL) with 1 mL 5,5-dimethyl-1-pyrroline-N-oxide (DMPO) under xenon lamp irradiation for 10 min. DMPO was used to trap the real-time generated  $\cdot\text{OH}$  in deionized water or  $\cdot\text{O}_2^-$  in methanol by forming DMPO- $\cdot\text{OH}$  or DMPO- $\cdot\text{O}_2^-$ , respectively. The ESR signals of DMPO- $\cdot\text{OH}$  and DMPO- $\cdot\text{O}_2^-$  were measured by Bruker EMXplus spectrometer.

### **High performance liquid chromatography (HPLC) and electrospray ionization-mass spectrometry (ESI-MS) tests**

The photodegradation intermediates were investigated by HPLC and ESI-MS. HPLC purification was performed on a Shimadzu UFLC system equipped with two LC-20AP pumps and an SPD-20A UV/vis detector using a Shimadzu PRC-ODS column. HPLC analyses were performed on an Agilent 1260 HPLC system equipped with a G1322A

pump and inline diode array UV detector using an Agilent Zorbax 300SB-C18 RP column with CH<sub>3</sub>CN (0.1% of trifluoroacetic acid (TFA)) and water (0.1% of TFA) as the eluent. The spectra of ESI-MS were obtained on a Finnigan LCQ Advantage ion trap mass spectrometer (ThermoFisher Corporation) that was equipped with a standard ESI source.

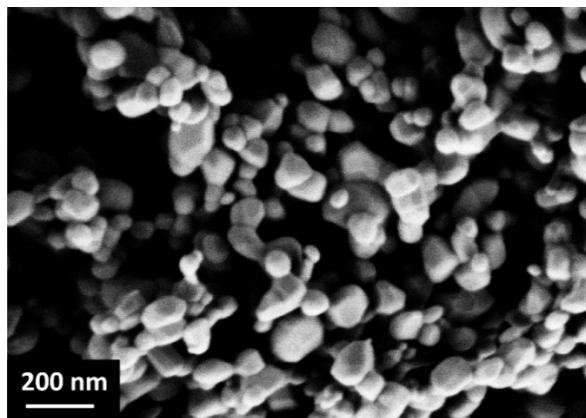

**Fig. S1** SEM image of blank ZnO.

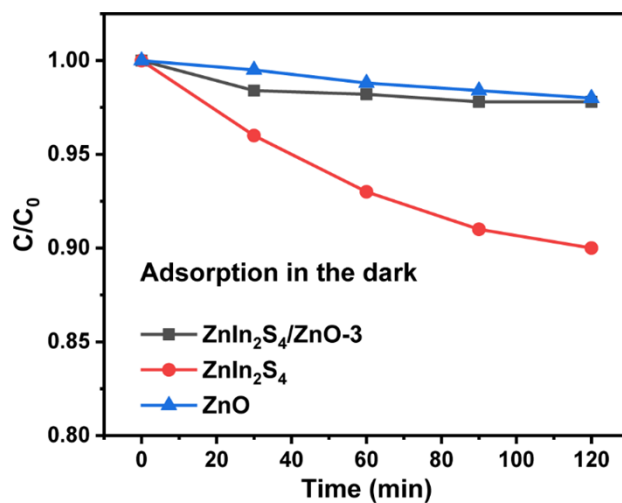

**Fig. S2** TC adsorption plots over the ZnIn<sub>2</sub>S<sub>4</sub>, ZnO, and ZnIn<sub>2</sub>S<sub>4</sub>/ZnO-3 in the dark.

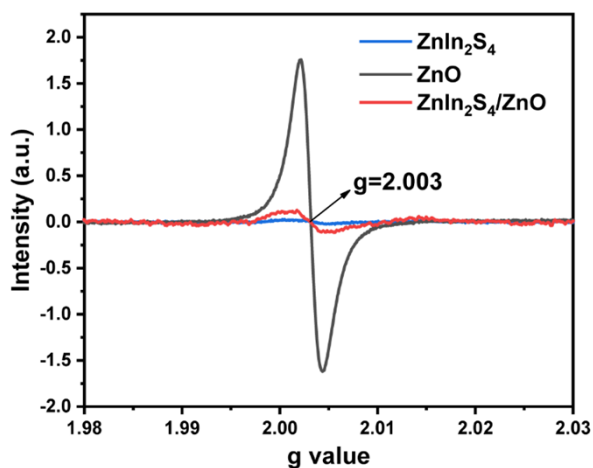

**Fig. S3** Room temperature ESR spectra of  $\text{ZnIn}_2\text{S}_4$ ,  $\text{ZnO}$  and  $\text{ZnIn}_2\text{S}_4/\text{ZnO}$ -3 samples oxygen for vacancy.

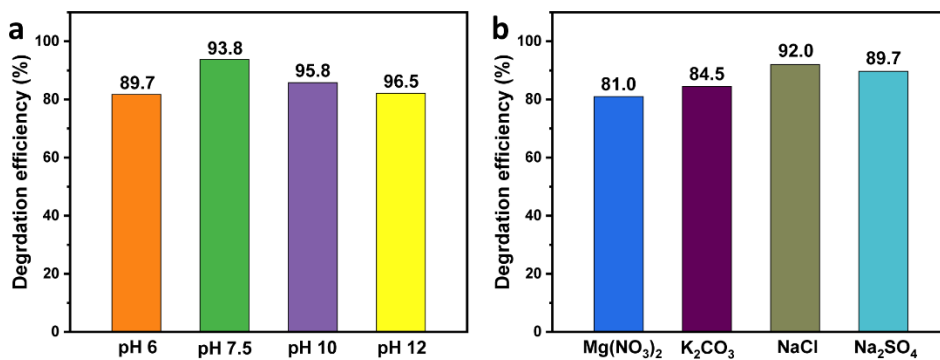

**Fig. S4** TC (25 mg/L) degradation efficiencies over the  $\text{ZnIn}_2\text{S}_4/\text{ZnO}$ -3 photocatalyst (a) at different pH and (b) with different salts (salt concentration is 0.1 M).

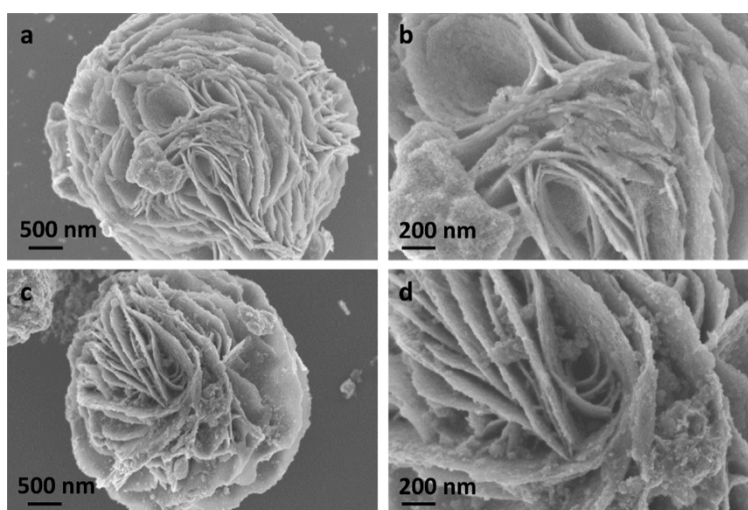

**Fig. S6** SEM images of  $\text{ZnIn}_2\text{S}_4/\text{ZnO}$ -3 before and after catalysis.

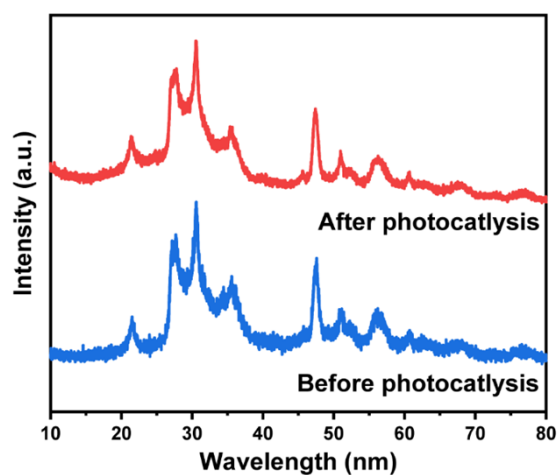

**Fig. S7** XRD patterns of ZnIn<sub>2</sub>S<sub>4</sub>/ZnO-3 before and after catalysis.

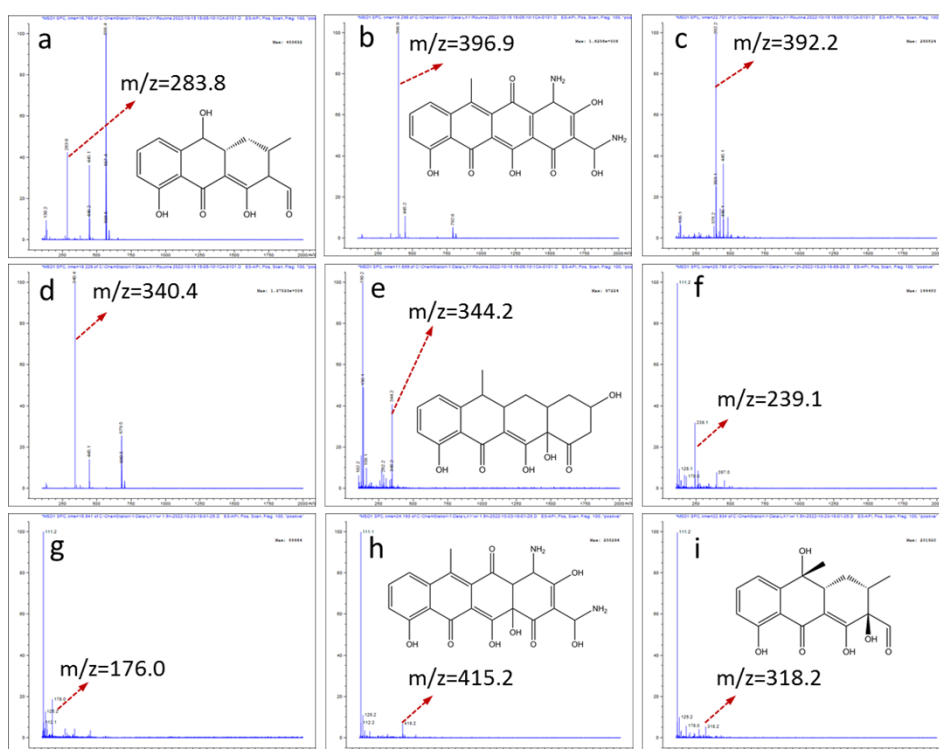

**Fig. S8** Mass spectra of intermediate products during tetracycline degradation over ZnIn<sub>2</sub>S<sub>4</sub>/ZnO-3.

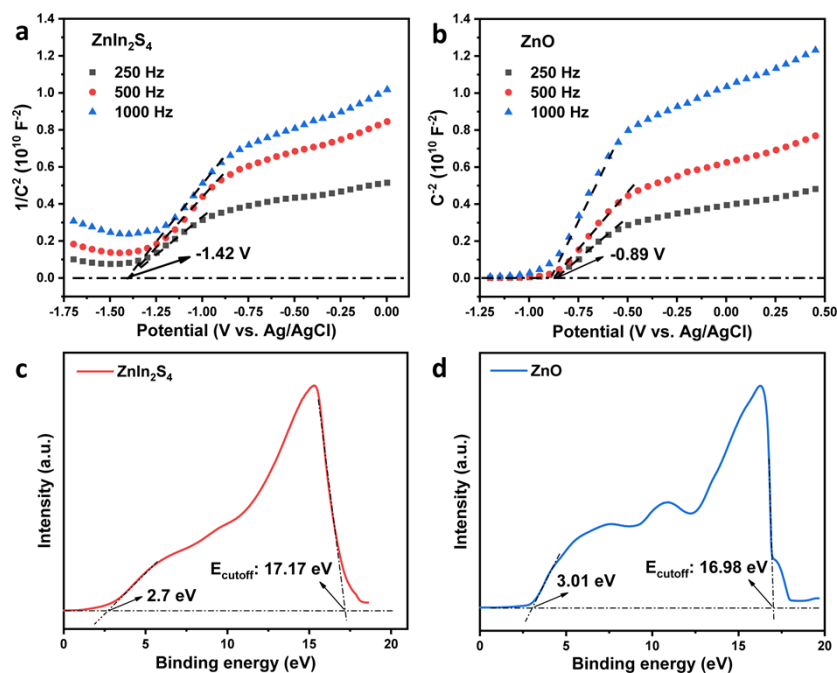

**Fig. S9** Mott-Schottky curves and UPS of (a)  $\text{ZnIn}_2\text{S}_4$  and (b)  $\text{ZnO}$ .

**Table S1** PL lifetime of  $\text{ZnIn}_2\text{S}_4$  and  $\text{ZnIn}_2\text{S}_4/\text{ZnO}$ -3.

| Sample                                  | $\tau_1$ (ns) | $\tau_2$ (ns) | $A_1$ (%) | $A_2$ (%) | $\tau_{\text{ave}}$ (ns) |
|-----------------------------------------|---------------|---------------|-----------|-----------|--------------------------|
| $\text{ZnIn}_2\text{S}_4$               | 2.45          | 12.56         | 98.6      | 1.4       | 3.12                     |
| $\text{ZnIn}_2\text{S}_4/\text{ZnO}$ -3 | 2.63          | 14.15         | 98.5      | 1.5       | 3.50                     |

**Table S2** Component parameters in the simulated circuit of impedance plots of  $\text{ZnIn}_2\text{S}_4$ ,  $\text{ZnO}$  and  $\text{ZnIn}_2\text{S}_4/\text{ZnO}$ -3 electrodes under mercury-xenon lamp irradiation.

| Sample                                  | $R_s$ (Ohm) | $R_{ct}$ (Ohm) | $C_{dl}$ ( $10^{-5}$ F) | $W$ ( $\text{S sec}^{0.5}$ ) |
|-----------------------------------------|-------------|----------------|-------------------------|------------------------------|
| $\text{ZnIn}_2\text{S}_4$               | 25.73       | 298            | 5.907                   | 0.02258                      |
| $\text{ZnO}$                            | 24.07       | 378.6          | 5.105                   | 0.02037                      |
| $\text{ZnIn}_2\text{S}_4/\text{ZnO}$ -3 | 20.24       | 186            | 8.697                   | 0.02986                      |
